# Supplementary material
Source: publisher site journal article supplement (https://www.degruyterbrill.com/publication/journal_key/NPF/downloadAsset/NPF_2024%20ARNOVA%20Asia%20Special%20Issue%20of%20Nonprofit%20Policy%20Forum.pdf)
Supplement: Supplementary file 1 [file NPF_2024%20ARNOVA%20Asia%20Special%20Issue%20of%20Nonprofit%20Policy%20Forum.pdf]

## 2024 ARNOVA-Asia Special Issue of *Nonprofit Policy Forum*

Dear Colleagues,

Upon the successful closing of the [2024 ARNOVA-Asia conference](#), the journal *Nonprofit Policy Forum* invites papers for a special issue dedicated to its theme, “Adapting to Crisis: Reshaping Nonprofit and Social Economy Sectors in and after the Wake of COVID-19.”

Scholars in the field of nonprofit and voluntary action studies have traditionally concentrated on traditional forms of assistance and the roles of organizations within the sector. However, the present era is marked by rapid and transformative changes, propelled by the emergence of cutting-edge technologies, including Artificial Intelligence (AI), Internet of Things (IoT), Blockchain, Machine Learning, and advanced data analytics. In parallel, within most societies, we anticipate the emergence of new social values brought forth by social economy organizations, including social enterprises, cooperatives, and B-corps. These organizations are redefining boundaries within the sector, blurring distinctions that were once clear.

Furthermore, the nonprofit sector has been profoundly impacted by the COVID-19 pandemic, which has prompted a swift and multifaceted response from organizations within the sector. In the wake of this crisis, the need to adapt, evolve, and innovate has become paramount.

This ***NPF ARNOVA-Asia 2024 Special Issue*** invites papers that address the conference theme in a wide range of nonprofit, charity & philanthropy, and social economy fields and welcomes both theoretical and empirical studies from all disciplines with a focus on any of the regions of Asia (West, Central, South, Southeast and East Asia).

Please note that submission to this *NPF Special Issue* is open to all authors addressing the conference theme regardless of their participation in the ARNOVA-Asia 2024 conference.

The mission of *Nonprofit Policy Forum (NPF)* is to serve as an international journal that publishes original research and analysis on public policy issues and the public policy process critical to the work of nonprofit organizations. The journal is **open access** and has no publication charges. More information about *Nonprofit Policy Forum* can be found [here](#). All submissions will be blind, peer-reviewed before they are accepted for publication in *NPF*. Instructions for submissions are available on the *NPF* website: <https://www.degruyter.com/journal/key/npf/html?lang=en>

**Deadline for full papers:** September 15, 2024. Fully completed manuscripts (conference participation not required) should be submitted for peer review via NPF’s online submission portal.

Please indicate that your submission is intended for the ARNOVA-Asia 2024 special issue. For further information, please contact the Guest Editor of this special issue, Dr. Seongho An, at [Seongho.An@ucf.edu](mailto:Seongho.An@ucf.edu).
